# Supplementary material
Source: Springer Nature journal article supplement (https://www.springermedizin.de/resource/supplementary/13075_2011_3500_MOESM2_ESM.pdf/9694670)

**A**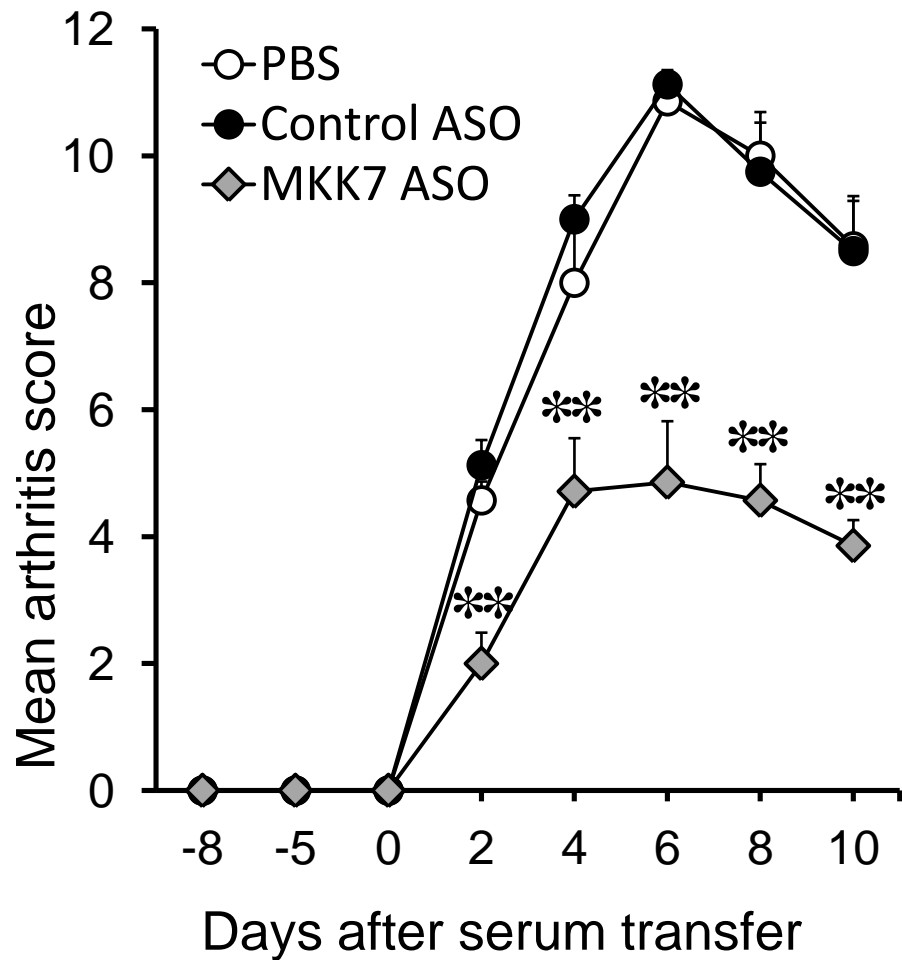**B**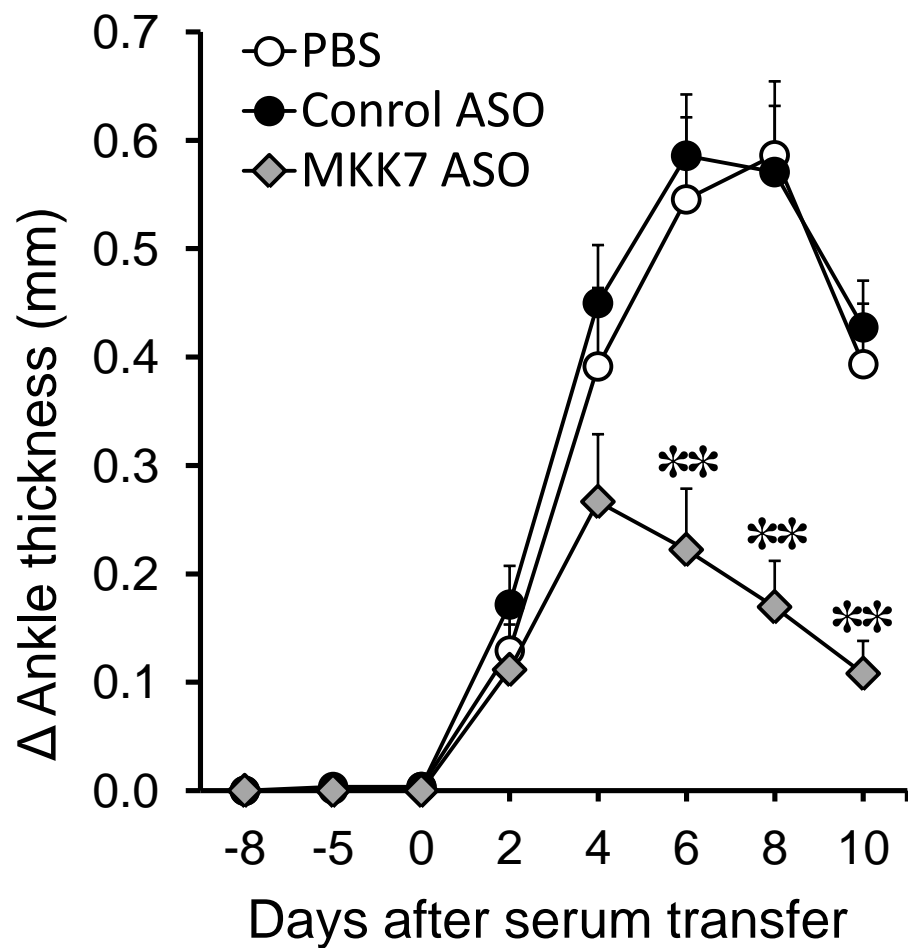

Supplement: MOESM2 [file 9694670]
